# Supplementary material for: Elucidating the interplay of local and mesoscale ion dynamics and transport properties in aprotic ionic liquids
Source: Royal Society of Chemistry journal article supplement (doi:10.1039/d2cp05863d), 2023-01-01
Supplement: d2cp05863d1.pdf [file d2cp05863d1.pdf]

# Supplementary Information for "Elucidating the Interplay of Local and Mesoscale Ion Dynamics and Transport Properties in Aprotic Ionic Liquids"

Tyler Cosby,<sup>\*,†</sup> Christopher D. Stachurski,<sup>‡</sup> Robert A. Mantz,<sup>¶</sup> Paul C. Trulove,<sup>‡</sup>  
and David P. Durkin<sup>\*,‡</sup>

<sup>†</sup>*Division of Mathematics and Sciences, University of Tennessee Southern, Pulaski, TN,  
USA.*

<sup>‡</sup>*Department of Chemistry, US Naval Academy, Annapolis, MD, USA.*

<sup>¶</sup>*Army Research Office, Durham, NC, USA.*

E-mail: jcosby3@utsouthern.edu; durkin@usna.edu

## Purity of Starting Materials

The purity of the synthesized 1-methyl-3-octylimidazolium chloride was ascertained by proton and carbon NMR measured on a Jeol ECX 400 MHz NMR spectrometer. The purity was estimated at  $\geq 99.9\%$ . The NMR spectra are provided in Figures 1 and 2. The C<sub>8</sub>MIm Cl was further used in the preparation of the C<sub>8</sub>MIm AlCl<sub>4</sub> and Al<sub>2</sub>Cl<sub>7</sub> ILs. On the basis of the purity of the C<sub>8</sub>MIm Cl their purities were estimated at  $\geq 99\%$ . The other ionic liquids were purchased from Iolitec and used as received without further verification of purity. Pu-

rities given in Experimental Methods are reproduced from the product information sheets provided by Iolitec.

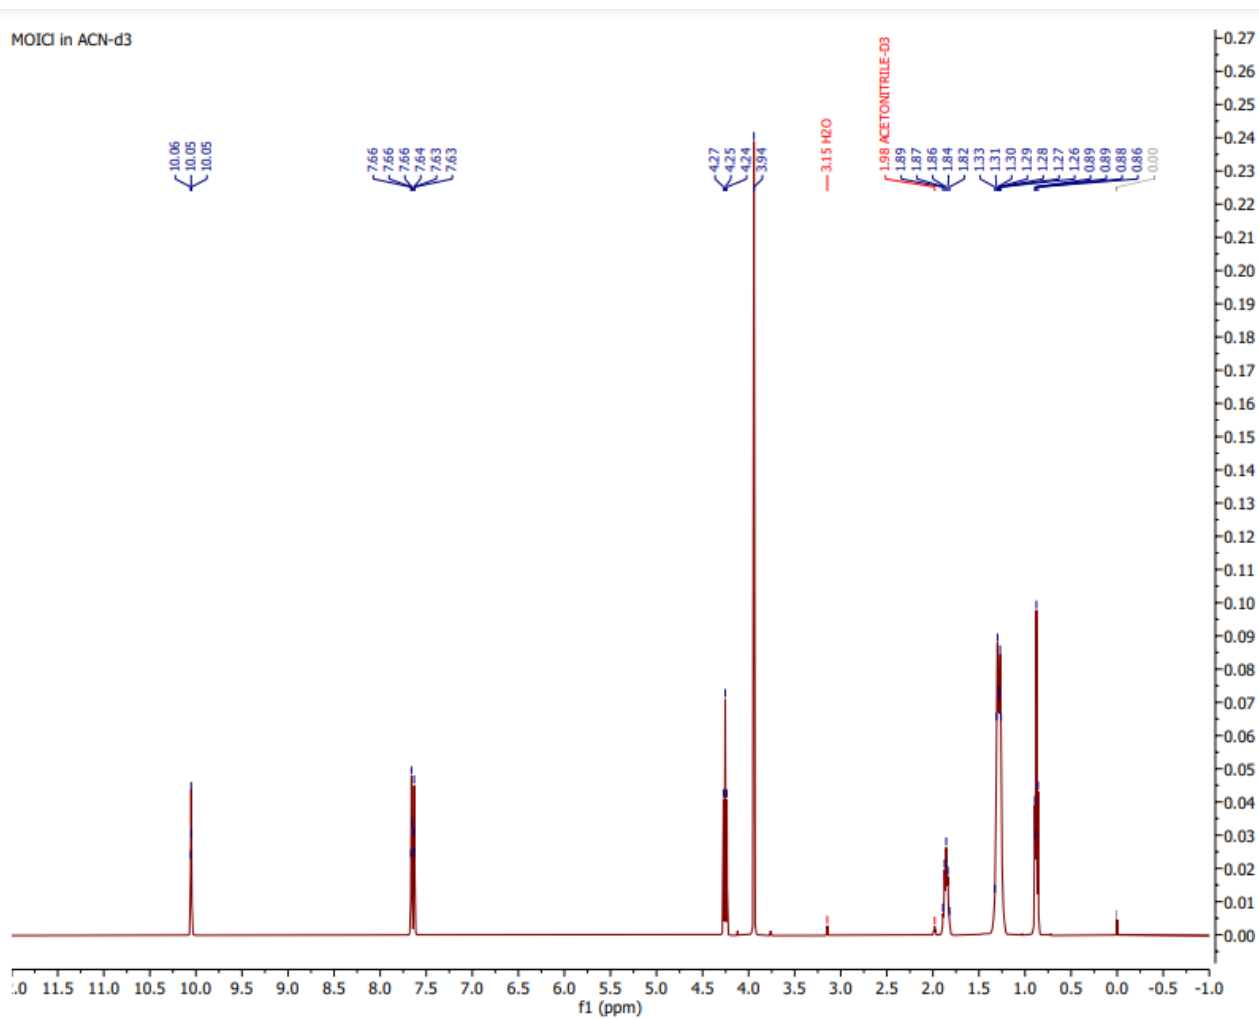

Figure 1:  $^1\text{H}$  NMR spectrum of  $\text{C}_8\text{MIm Cl}$  in deuterated acetonitrile.

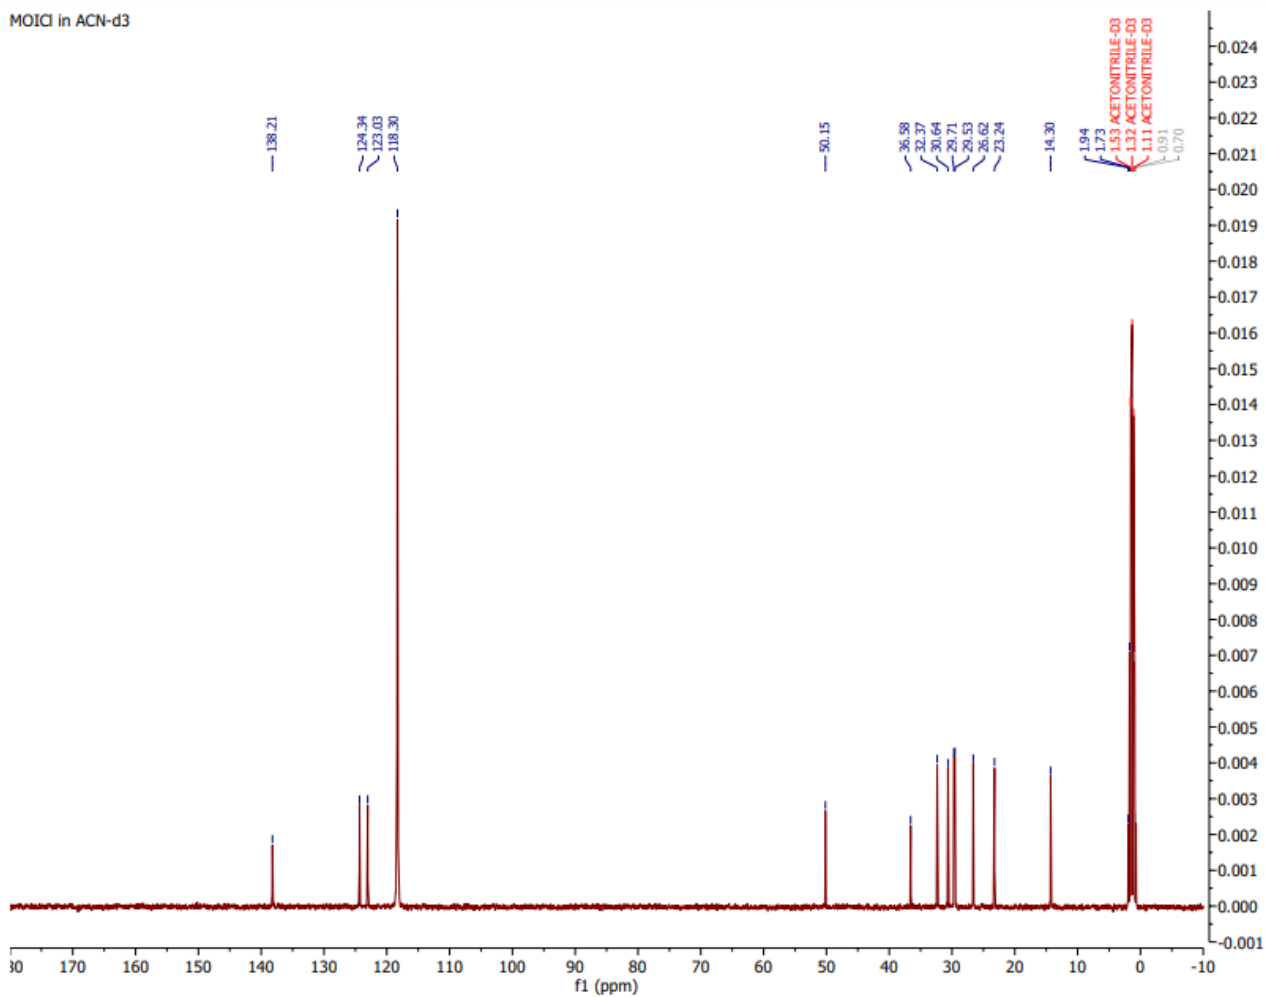

Figure 2:  $^{13}\text{C}$  NMR spectrum of  $\text{C}_8\text{MIm Cl}$  in deuterated acetonitrile.

# Broadband Dielectric Spectroscopy

The three formalisms in which the dielectric data are presented,  $\sigma^*(\omega)$ ,  $M^*(\omega)$ , and  $\varepsilon^*(\omega)$ , are each interrelated.<sup>1</sup> The complex electric modulus is defined as the inverse of complex dielectric permittivity,  $M^*(\omega) = \frac{1}{\varepsilon^*(\omega)}$ . The imaginary part of complex electric modulus is then given as  $M''(\omega) = \frac{\varepsilon''(\omega)}{(\varepsilon'(\omega))^2 + (\varepsilon''(\omega))^2}$ . The complex conductivity is related to complex dielectric permittivity as  $\sigma^*(\omega) = i\omega\varepsilon_0\varepsilon^*(\omega)$ , where  $\varepsilon_0$  is the permittivity of free space. The real part of complex conductivity is then directly related to the imaginary part of complex dielectric permittivity as  $\sigma'(\omega) = \omega\varepsilon_0\varepsilon''(\omega)$ .

The broadband dielectric spectra of the 1-methyl-3-octylimidazolium ionic liquids are presented in Supplementary Figures 6, 7, 8, 9, 10, 11, 12, 13, 14.

## Relaxation Rates

The temperature dependent relaxation rates were fit using the Vogel-Fulcher-Tammann equation,  $\omega_i = \omega_\infty e^{\frac{-DT_0}{T-T_0}}$ . The fit parameters are given in Tables 3, 4, 5, 6.

## Density

The mass densities measured using an Anton-Paar SVM-3000 Stabinger viscometer, are presented in Supplementary Figure 3.

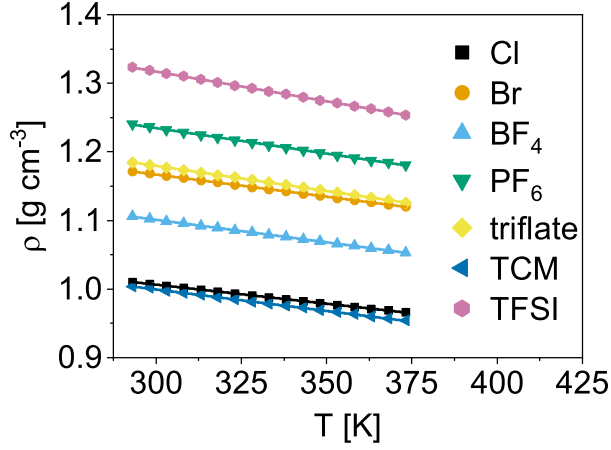

Figure 3: Temperature dependent mass densities of 1-methyl-3-octylimidazolium ionic liquids with the indicated anions. Lines correspond to linear fits,  $\rho = mT + b$ . Fit parameters are provided in Table 1.

Table 1: Linear fit parameters of temperature dependent mass density.

| IL                                                 | m                       | b      |
|----------------------------------------------------|-------------------------|--------|
| C <sub>8</sub> MIm Cl                              | $-5.555 \times 10^{-4}$ | 1.1732 |
| C <sub>4</sub> MIm Br                              | $-6.439 \times 10^{-4}$ | 1.3601 |
| C <sub>6</sub> MIm BF <sub>4</sub>                 | $-6.567 \times 10^{-4}$ | 1.2980 |
| C <sub>8</sub> MIm PF <sub>6</sub>                 | $-7.434 \times 10^{-4}$ | 1.4577 |
| C <sub>6</sub> MIm TCM                             | $-6.259 \times 10^{-4}$ | 1.1872 |
| C <sub>8</sub> MIm triflate                        | $-7.342 \times 10^{-4}$ | 1.3999 |
| C <sub>8</sub> MIm AlCl <sub>4</sub>               | -                       | -      |
| C <sub>8</sub> MIm TFSI                            | $-8.650 \times 10^{-4}$ | 1.5765 |
| C <sub>8</sub> MIm Al <sub>2</sub> Cl <sub>7</sub> | -                       | -      |

## Differential Scanning Calorimetry

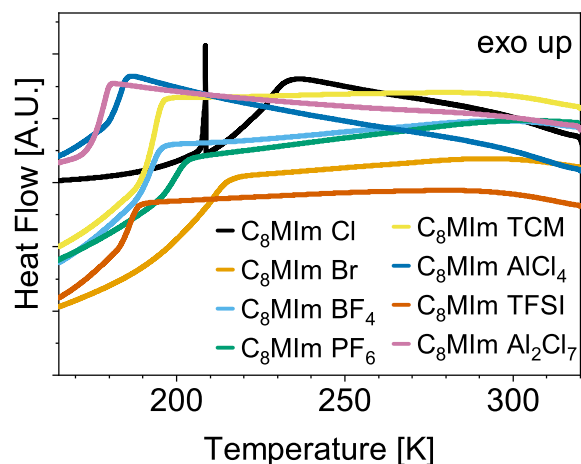

Figure 4: Measured heat flow on cooling of the indicated ILs. Each IL has a glass transition temperature (evidenced by the step decrease in heat flow) and no evidence of crystallization. Cooling rate =  $10\text{ }^{\circ}\text{C min}^{-1}$ . The sharp peak below the  $T_g$  in the C<sub>8</sub>MIm Cl curve is an experimental artifact.

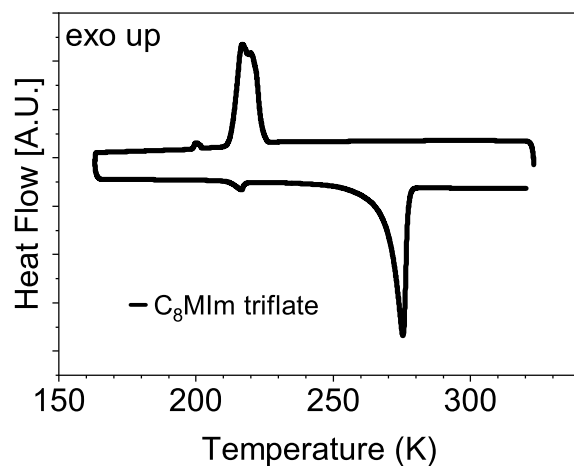

Figure 5: Measured heat flow on cooling of C<sub>8</sub>MIm PF<sub>6</sub>. This IL undergoes crystallization at 223 K. Cooling/heating rate =  $10\text{ }^{\circ}\text{C min}^{-1}$

# High-Frequency Shear Modulus

The values of high-frequency limiting, glassy shear modulus,  $G_\infty$ , used in Maxwell's relation to calculate the structural relaxation rate,  $\omega_\eta = G_\infty/\eta_0$ , are presented in Table 2.

Table 2: High-frequency limiting, glassy shear moduli,  $G_\infty$ , of the investigated ILs.

| IL                                                 | $G_\infty$ [GPa] |
|----------------------------------------------------|------------------|
| C <sub>8</sub> MIm Cl                              | 0.4              |
| C <sub>4</sub> MIm Br                              | 0.6              |
| C <sub>6</sub> MIm BF <sub>4</sub>                 | 0.7              |
| C <sub>8</sub> MIm PF <sub>6</sub>                 | 0.6              |
| C <sub>6</sub> MIm TCM                             | 0.6              |
| C <sub>8</sub> MIm triflate                        | 0.4              |
| C <sub>8</sub> MIm AlCl <sub>4</sub>               | 0.6              |
| C <sub>8</sub> MIm TFSI                            | 0.5              |
| C <sub>8</sub> MIm Al <sub>2</sub> Cl <sub>7</sub> | 0.5              |

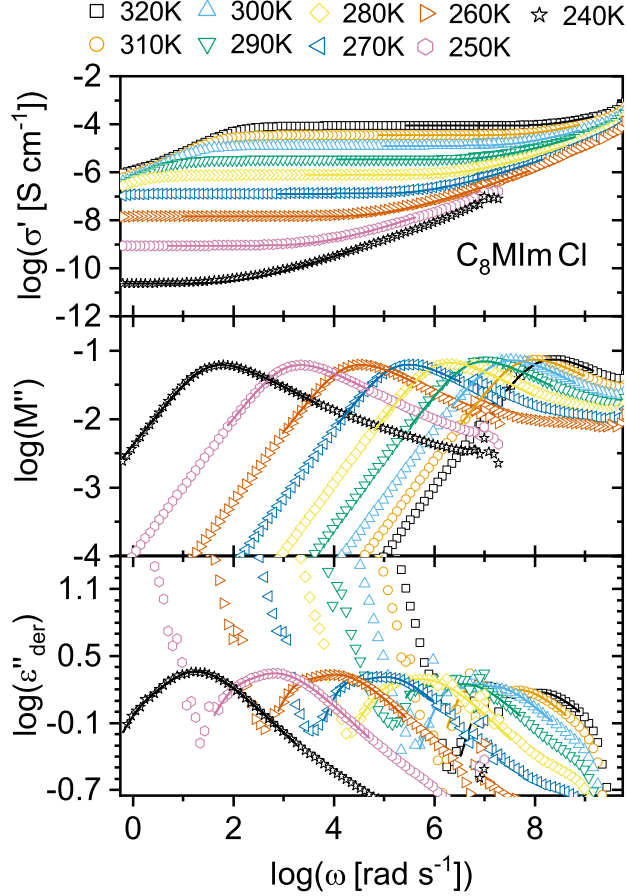

Figure 6: Frequency,  $\omega$ , and temperature-dependent dielectric spectra of 1-octyl-3-methylimidazolium chloride ( $C_8MIm Cl$ ). (Top) Real part of complex conductivity,  $\sigma'(\omega)$ . Lines represent fits by the RBM. Arrows correspond to the ion-hopping rates,  $\omega_{RBM}$ . (Middle) Imaginary part of complex electric modulus,  $M''(\omega)$ . Lines represent fits by a single Havriliak-Negami (HN) function. The arrows correspond to the peak maximum,  $\omega_{M''}$ . (Bottom) Derivative representation of the real part of complex dielectric permittivity,  $\varepsilon''_{der}$ . Solid lines represent the total fit obtained by a combination of up to two HN functions. The separate component fit functions are presented as dashed and dotted lines. The shaded areas depict the contribution of the primary,  $\alpha$  dielectric relaxation. The arrows correspond to the  $\alpha$ -relaxation rate,  $\omega_\alpha$ .



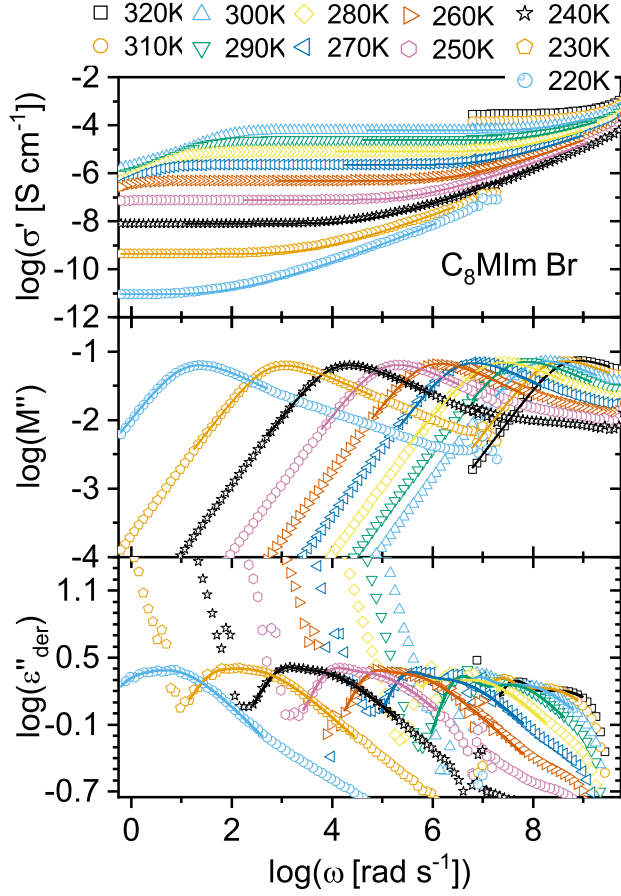

Figure 7: Dielectric spectra of 1-octyl-3-methylimidazolium bromide ( $C_8MIm Br$ ). (Top) Real part of complex conductivity,  $\sigma'(\omega)$ . (Middle) Imaginary part of complex electric modulus,  $M''(\omega)$ . (Bottom) Derivative representation of the real part of complex dielectric permittivity,  $\epsilon''_{der}$ . Lines have the same meaning as in Figure 6.

Table 3: Vogel-Fulcher-Tammann fit parameters obtained from the temperature-dependent Random Barrier Model ion-hopping rates,  $\omega_{RBM}$ .

| IL                | $\omega_\infty$ [rad s <sup>-1</sup> ] | D    | T <sub>0</sub> [K] |
|-------------------|----------------------------------------|------|--------------------|
| $C_8MIm Cl$       | $8.94 \times 10^{12}$                  | 9.2  | 177.9              |
| $C_8MIm Br$       | $1.11 \times 10^{13}$                  | 11.3 | 155                |
| $C_8MIm BF_4$     | $1.41 \times 10^{12}$                  | 8.1  | 150.7              |
| $C_8MIm PF_6$     | $2.04 \times 10^{12}$                  | 8.8  | 154.2              |
| $C_8MIm TCM$      | $1.11 \times 10^{12}$                  | 5.5  | 161.7              |
| $C_8MIm triflate$ | -                                      | -    | -                  |
| $C_8MIm AlCl_4$   | $4.08 \times 10^{11}$                  | 5.8  | 151.6              |
| $C_8MIm TFSI$     | $5.59 \times 10^{11}$                  | 6.6  | 151.6              |
| $C_8MIm Al_2Cl_7$ | $1.73 \times 10^{11}$                  | 4.9  | 150.1              |

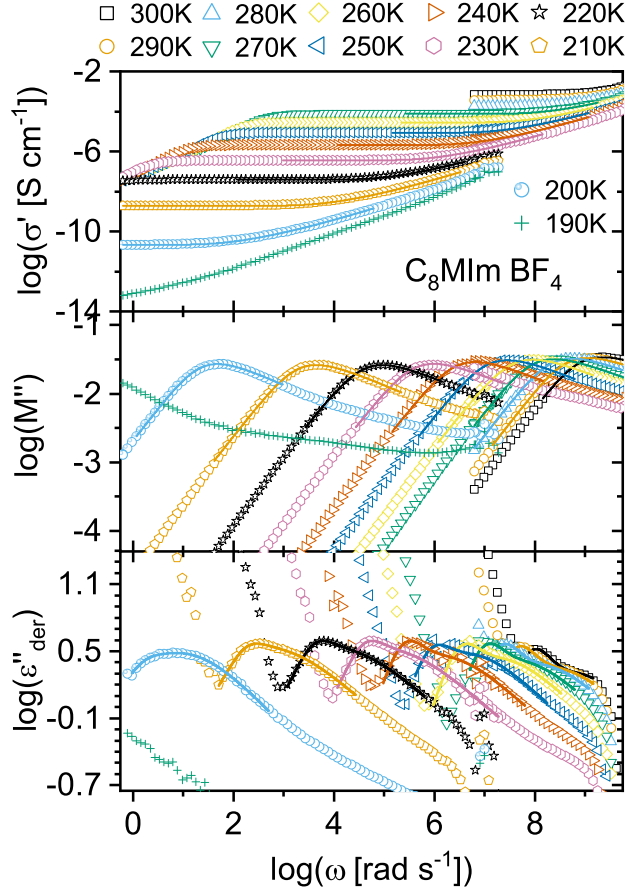

Figure 8: Dielectric spectra of 1-octyl-3-methylimidazolium tetrafluoroborate ( $C_8MIm BF_4$ ). (Top) Real part of complex conductivity,  $\sigma'(\omega)$ . (Middle) Imaginary part of complex electric modulus,  $M''(\omega)$ . (Bottom) Derivative representation of the real part of complex dielectric permittivity,  $\epsilon''_{\text{der}}$ . Lines have the same meaning as in Figure 6.

Table 4: Vogel-Fulcher-Tammann fit parameters obtained from the temperature-dependent peak-frequency of  $M''$ ,  $\omega_{M''}$ .

| IL                | $\omega_{\infty}$ [rad s <sup>-1</sup> ] | D    | T <sub>0</sub> [K] |
|-------------------|------------------------------------------|------|--------------------|
| $C_8MIm Cl$       | $7.82 \times 10^{13}$                    | 10.7 | 173.4              |
| $C_8MIm Br$       | $5.60 \times 10^{12}$                    | 11.5 | 156.8              |
| $C_8MIm BF_4$     | $1.27 \times 10^{13}$                    | 8.6  | 150.7              |
| $C_8MIm PF_6$     | $2.73 \times 10^{13}$                    | 9.0  | 155.4              |
| $C_8MIm TCM$      | $3.26 \times 10^{13}$                    | 6.6  | 159.8              |
| $C_8MIm triflate$ | -                                        | -    | -                  |
| $C_8MIm AlCl_4$   | $2.58 \times 10^{12}$                    | 5.2  | 155.8              |
| $C_8MIm TFSI$     | $7.01 \times 10^{12}$                    | 6.8  | 152.6              |
| $C_8MIm Al_2Cl_7$ | $3.36 \times 10^{12}$                    | 4.9  | 153.1              |

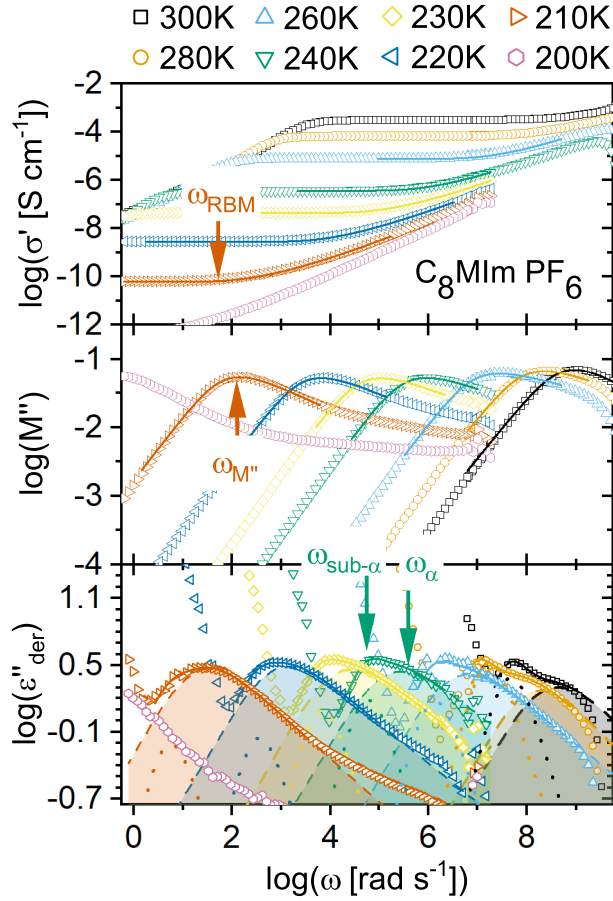

Figure 9: Dielectric spectra of 1-octyl-3-methylimidazolium hexafluorophosphate ( $C_8MIm PF_6$ ). (Top) Real part of complex conductivity,  $\sigma'(\omega)$ . (Middle) Imaginary part of complex electric modulus,  $M''(\omega)$ . (Bottom) Derivative representation of the real part of complex dielectric permittivity,  $\epsilon''_{der}$ . Lines have the same meaning as in Figure 6.

Table 5: Vogel-Fulcher-Tammann fit parameters obtained from the temperature-dependent relaxation rate of the primary,  $\alpha$  dielectric relaxation,  $\omega_\alpha$ .

| IL                | $\omega_\infty$ [rad s $^{-1}$ ] | D    | $T_0$ [K] |
|-------------------|----------------------------------|------|-----------|
| $C_8MIm Cl$       | $1.65 \times 10^{12}$            | 9.2  | 179.7     |
| $C_8MIm Br$       | $2.81 \times 10^{14}$            | 15.2 | 148.4     |
| $C_8MIm BF_4$     | $1.42 \times 10^{13}$            | 9.9  | 147.9     |
| $C_8MIm PF_6$     | $5.25 \times 10^{13}$            | 12.0 | 147.0     |
| $C_8MIm TCM$      | $2.67 \times 10^{13}$            | 7.4  | 158.0     |
| $C_8MIm triflate$ | -                                | -    | -         |
| $C_8MIm AlCl_4$   | $2.66 \times 10^{12}$            | 5.6  | 156.5     |
| $C_8MIm TFSI$     | $5.36 \times 10^{12}$            | 7.4  | 151.3     |
| $C_8MIm Al_2Cl_7$ | $2.80 \times 10^{12}$            | 5.5  | 152.1     |

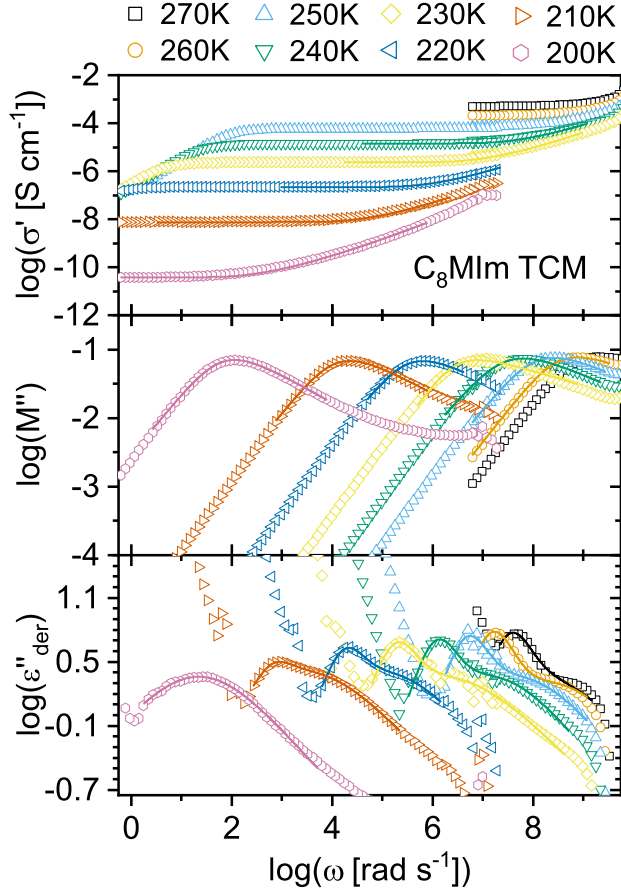

Figure 10: Dielectric spectra of 1-octyl-3-methylimidazolium tricyanomethanide ( $C_8MIm$  TCM). (Top) Real part of complex conductivity,  $\sigma'(\omega)$ . (Middle) Imaginary part of complex electric modulus,  $M''(\omega)$ . (Bottom) Derivative representation of the real part of complex dielectric permittivity,  $\epsilon''_{\text{der}}$ . Lines have the same meaning as in Figure 6.

Table 6: Vogel-Fulcher-Tammann fit parameters obtained from the temperature-dependent rate of the slower, sub- $\alpha$  dielectric relaxation,  $\omega_{\text{sub-}\alpha}$ .

| IL                  | $\omega_{\infty}$ [rad s $^{-1}$ ] | D    | $T_0$ [K] |
|---------------------|------------------------------------|------|-----------|
| $C_8MIm$ Cl         | $1.57 \times 10^{14}$              | 12.0 | 171.1     |
| $C_8MIm$ Br         | $2.09 \times 10^{12}$              | 11.2 | 158.0     |
| $C_8MIm$ $BF_4$     | $3.26 \times 10^{11}$              | 7.9  | 153.0     |
| $C_8MIm$ $PF_6$     | $3.70 \times 10^{11}$              | 7.9  | 159.3     |
| $C_8MIm$ TCM        | $4.81 \times 10^{11}$              | 6.6  | 158.8     |
| $C_8MIm$ triflate   | -                                  | -    | -         |
| $C_8MIm$ $AlCl_4$   | $1.93 \times 10^{11}$              | 6.2  | 151.0     |
| $C_8MIm$ TFSI       | $1.91 \times 10^{11}$              | 6.8  | 152.2     |
| $C_8MIm$ $Al_2Cl_7$ | $2.65 \times 10^{11}$              | 6.3  | 145.9     |

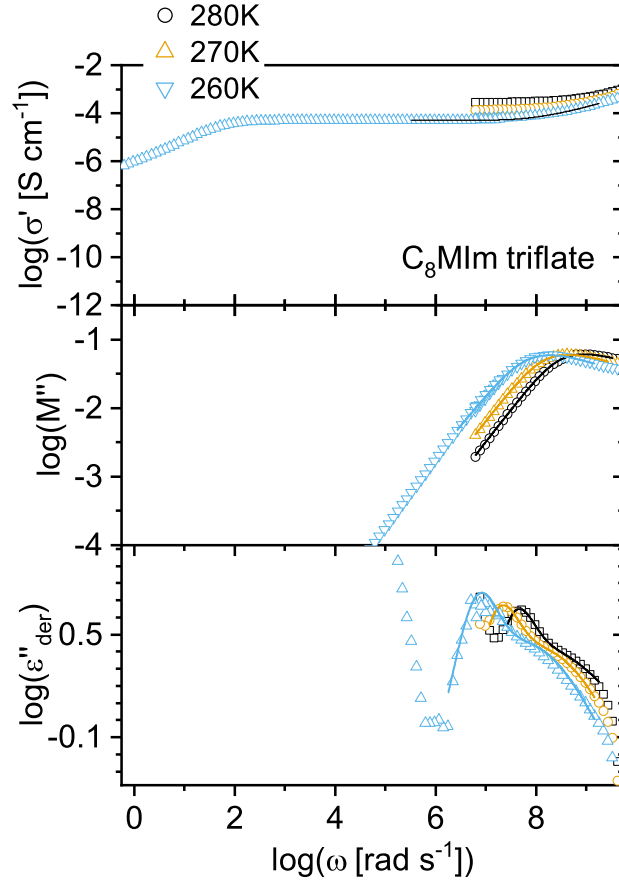

Figure 11: Dielectric spectra of 1-octyl-3-methylimidazolium triflate ( $C_8MIm$  triflate). (Top) Real part of complex conductivity,  $\sigma'(\omega)$ . (Middle) Imaginary part of complex electric modulus,  $M''(\omega)$ . (Bottom) Derivative representation of the real part of complex dielectric permittivity,  $\epsilon''_{der}$ . Lines have the same meaning as in Figure 6.

Table 7: Vogel-Fulcher-Tammann fit parameters obtained from the temperature-dependent dc ionic conductivities,  $\sigma_0$  [ $S\ cm^{-1}$ ].

| IL                 | $\sigma_\infty$ [ $S\ cm^{-1}$ ] | D    | $T_0$ [K] |
|--------------------|----------------------------------|------|-----------|
| $C_8MIm\ Cl$       | 19.2                             | 10.3 | 174.7     |
| $C_8MIm\ Br$       | 10.5                             | 10.7 | 158.7     |
| $C_8MIm\ BF_4$     | 3.1                              | 8.4  | 150.6     |
| $C_8MIm\ PF_6$     | 3.6                              | 8.8  | 155.0     |
| $C_8MIm\ TCM$      | 2.1                              | 5.5  | 163.9     |
| $C_8MIm\ triflate$ | -                                | -    | -         |
| $C_8MIm\ AlCl_4$   | 1.2                              | 5.9  | 152.5     |
| $C_8MIm\ TFSI$     | 1.8                              | 7.1  | 150.3     |
| $C_8MIm\ Al_2Cl_7$ | 0.67                             | 5.1  | 151.0     |

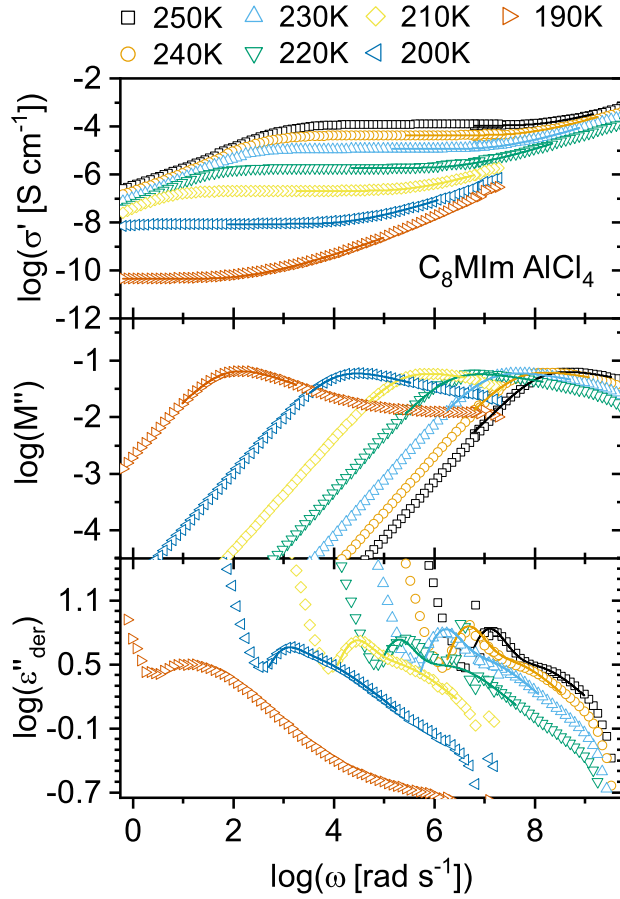

Figure 12: Dielectric spectra of 1-octyl-3-methylimidazolium tetrachlorodialuminate ( $C_8MIm AlCl_4$ ). (Top) Real part of complex conductivity,  $\sigma'(\omega)$ . (Middle) Imaginary part of complex electric modulus,  $M''(\omega)$ . (Bottom) Derivative representation of the real part of complex dielectric permittivity,  $\epsilon''_{\text{der}}$ . Lines have the same meaning as in Figure 6.

Table 8: Vogel-Fulcher-Tammann fit parameters obtained from the temperature-dependent fluidities,  $\eta_0^{-1}$  [ $\text{Pa}^{-1} \text{s}^{-1}$ ].

| IL                | $\eta_{\infty}^{-1}$ [ $\text{Pa}^{-1} \text{s}^{-1}$ ] | D    | $T_0$ [K] |
|-------------------|---------------------------------------------------------|------|-----------|
| $C_8MIm Cl$       | $1.1 \times 10^5$                                       | 10.6 | 173.5     |
| $C_8MIm Br$       | $1.02 \times 10^5$                                      | 11.2 | 160.2     |
| $C_8MIm BF_4$     | $2.83 \times 10^4$                                      | 9.3  | 147.4     |
| $C_8MIm PF_6$     | $3.24 \times 10^4$                                      | 9.5  | 152.6     |
| $C_8MIm TCM$      | $1.43 \times 10^4$                                      | 5.6  | 163.3     |
| $C_8MIm triflate$ | -                                                       | -    | -         |
| $C_8MIm AlCl_4$   | $1.39 \times 10^4$                                      | 6.4  | 149.8     |
| $C_8MIm TFSI$     | $2.16 \times 10^4$                                      | 7.4  | 149.0     |
| $C_8MIm Al_2Cl_7$ | $4.79 \times 10^3$                                      | 4.6  | 155.1     |

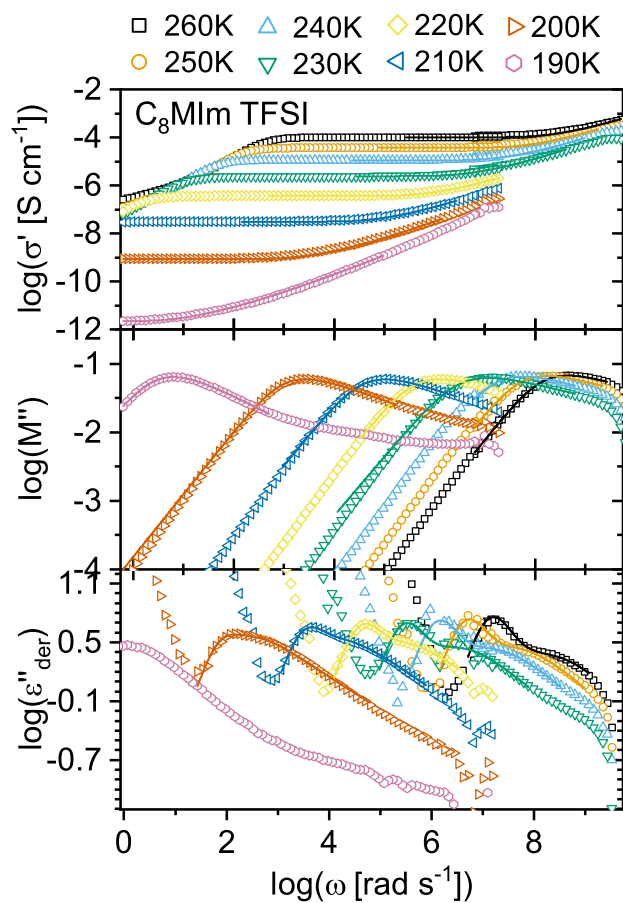

Figure 13: Dielectric spectra of 1-octyl-3-methylimidazolium bis(trifluoromethylsulfonyl)imide ( $C_8MIm$  TFSI). (Top) Real part of complex conductivity,  $\sigma'(\omega)$ . (Middle) Imaginary part of complex electric modulus,  $M''(\omega)$ . (Bottom) Derivative representation of the real part of complex dielectric permittivity,  $\epsilon''_{der}$ . Lines have the same meaning as in Figure 6.

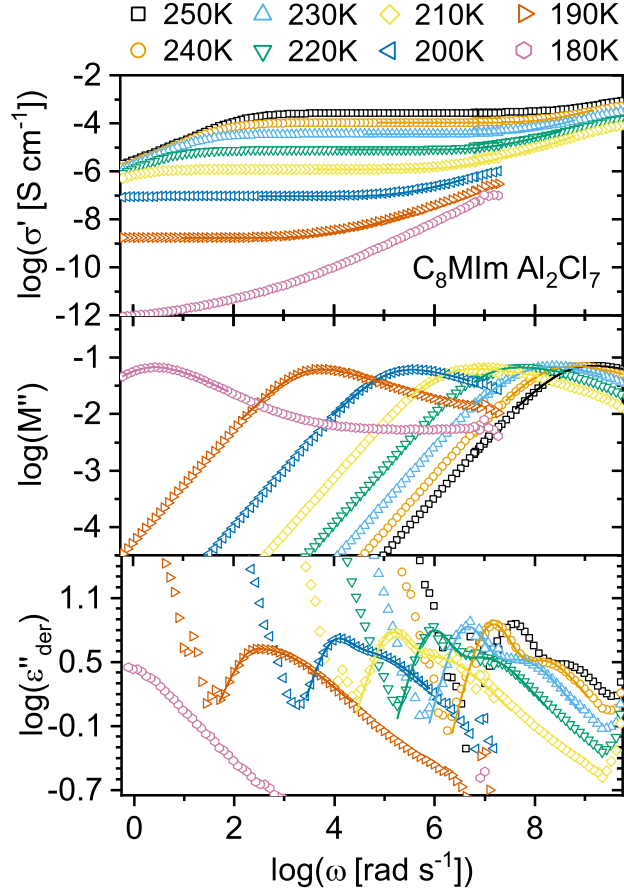

Figure 14: Dielectric spectra of 1-octyl-3-methylimidazolium heptachlorodialuminate ( $C_8MIm Al_2Cl_7$ ). (Top) Real part of complex conductivity,  $\sigma'(\omega)$ . (Middle) Imaginary part of complex electric modulus,  $M''(\omega)$ . (Bottom) Derivative representation of the real part of complex dielectric permittivity,  $\epsilon''_{der}$ . Lines have the same meaning as in Figure 6.

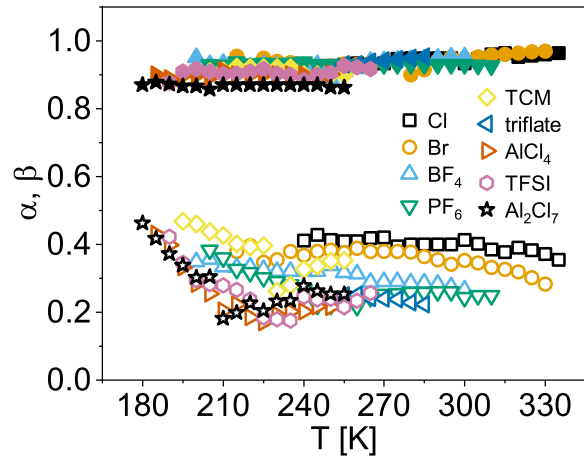

Figure 15: Shape parameters,  $\alpha$  (closed symbols) and  $\beta$  (open symbols), of Havriliak-Negami fits applied to the imaginary part of the complex electric modulus.



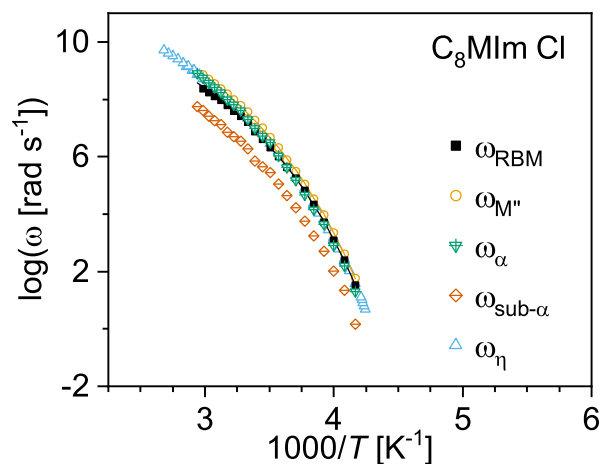

Figure 16: Temperature-dependent relaxation rates of the 1-octyl-3-methylimidazolium chloride ( $C_8MIm\ Cl$ ). Rates are obtained by analysis of the dielectric spectra ( $\omega_{RBM}$ ,  $\omega_{M''}$ ,  $\omega_{\alpha}$ ,  $\omega_{sub-\alpha}$ ) and rheology ( $\omega_{\eta}$ ). Lines correspond to fits by the VFT equation.

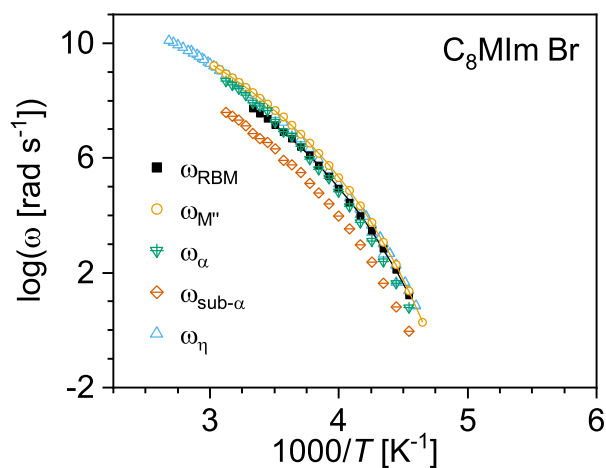

Figure 17: Temperature-dependent relaxation rates of the 1-octyl-3-methylimidazolium bromide ( $C_8MIm\ Br$ ). Rates are obtained by analysis of the dielectric spectra ( $\omega_{RBM}$ ,  $\omega_{M''}$ ,  $\omega_{\alpha}$ ,  $\omega_{sub-\alpha}$ ) and rheology ( $\omega_{\eta}$ ). Lines correspond to fits by the VFT equation.

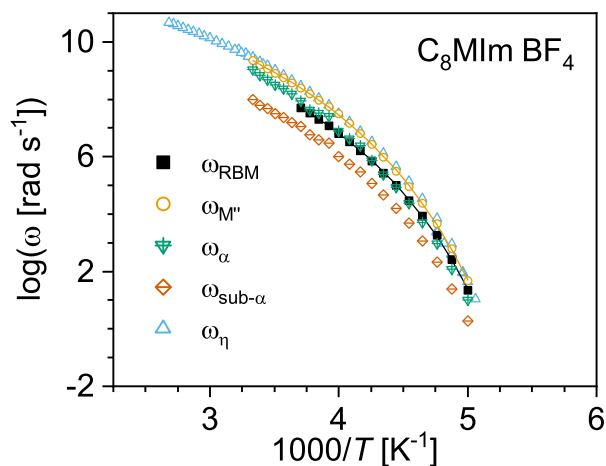

Figure 18: Temperature-dependent relaxation rates of the 1-octyl-3-methylimidazolium tetrafluoroborate ( $C_8MIm BF_4$ ). Rates are obtained by analysis of the dielectric spectra ( $\omega_{RBM}$ ,  $\omega_{M''}$ ,  $\omega_{\alpha}$ ,  $\omega_{sub-\alpha}$ ) and rheology ( $\omega_{\eta}$ ). Lines correspond to fits by the VFT equation.

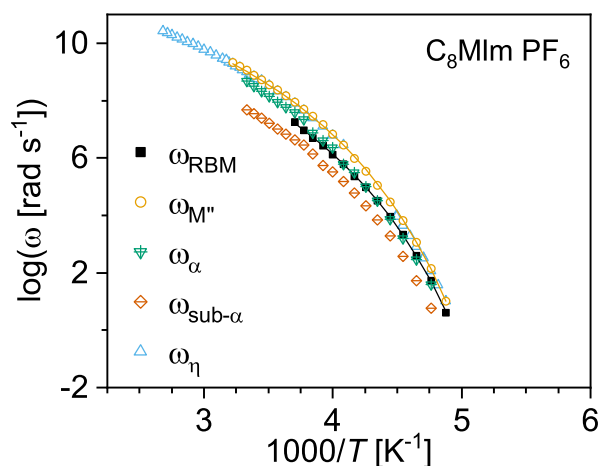

Figure 19: Temperature-dependent relaxation rates of the 1-octyl-3-methylimidazolium hexafluorophosphate ( $C_8MIm PF_6$ ). Rates are obtained by analysis of the dielectric spectra ( $\omega_{RBM}$ ,  $\omega_{M''}$ ,  $\omega_{\alpha}$ ,  $\omega_{sub-\alpha}$ ) and rheology ( $\omega_{\eta}$ ). Lines correspond to fits by the VFT equation.

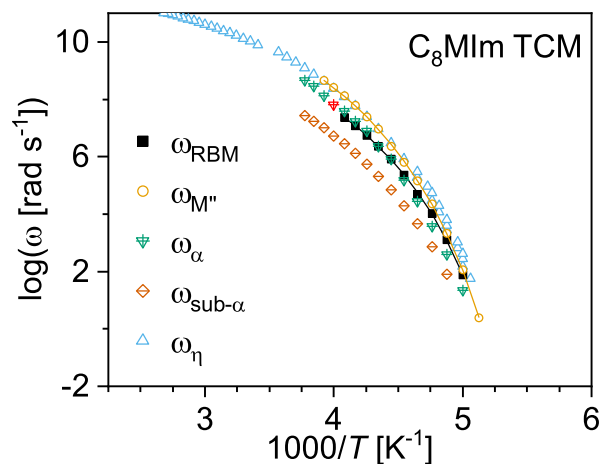

Figure 20: Temperature-dependent relaxation rates of the 1-octyl-3-methylimidazolium tri-cyanomethanide ( $C_8MIm$  TCM). Rates are obtained by analysis of the dielectric spectra ( $\omega_{RBM}$ ,  $\omega_{M''}$ ,  $\omega_{\alpha}$ ,  $\omega_{sub-\alpha}$ ) and rheology ( $\omega_{\eta}$ ). Lines correspond to fits by the VFT equation.

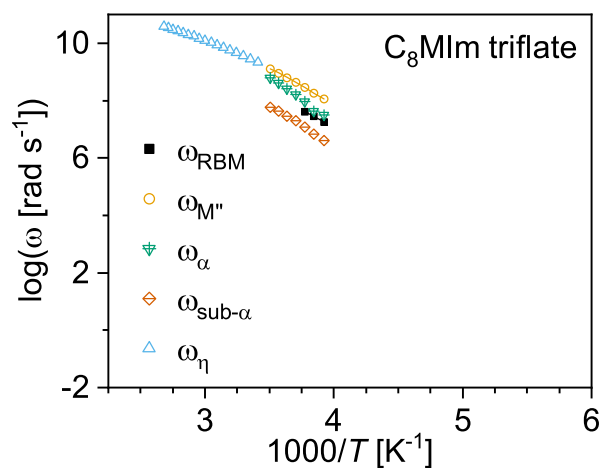

Figure 21: Temperature-dependent relaxation rates of the 1-octyl-3-methylimidazolium triflate ( $C_8MIm$  triflate). Rates are obtained by analysis of the dielectric spectra ( $\omega_{RBM}$ ,  $\omega_{M''}$ ,  $\omega_{\alpha}$ ,  $\omega_{sub-\alpha}$ ) and rheology ( $\omega_{\eta}$ ). Lines correspond to fits by the VFT equation.

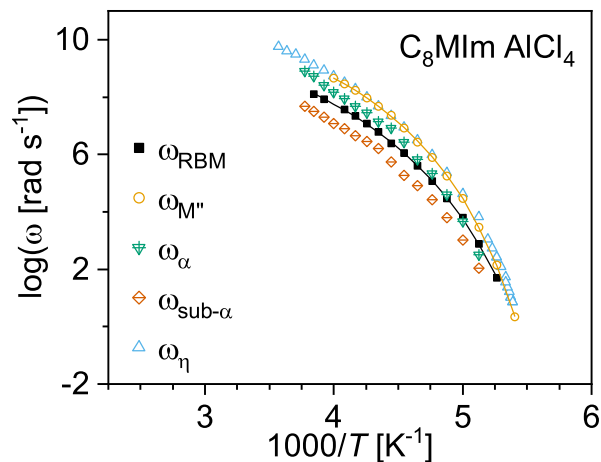

Figure 22: Temperature-dependent relaxation rates of the 1-octyl-3-methylimidazolium tetrachlorodialuminate ( $C_8MIm AlCl_4$ ). Rates are obtained by analysis of the dielectric spectra ( $\omega_{RBM}$ ,  $\omega_{M''}$ ,  $\omega_\alpha$ ,  $\omega_{sub-\alpha}$ ) and rheology ( $\omega_\eta$ ). Lines correspond to fits by the VFT equation.

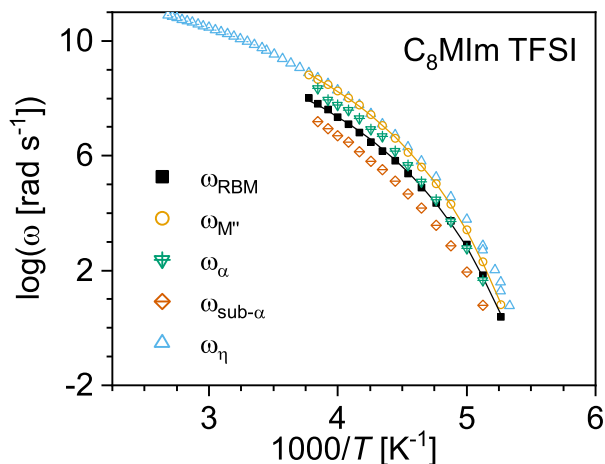

Figure 23: Temperature-dependent relaxation rates of the 1-octyl-3-methylimidazolium bis(trifluoromethylsulfonyl)imide ( $C_8MIm TFSI$ ). Rates are obtained by analysis of the dielectric spectra ( $\omega_{RBM}$ ,  $\omega_{M''}$ ,  $\omega_\alpha$ ,  $\omega_{sub-\alpha}$ ) and rheology ( $\omega_\eta$ ). Lines correspond to fits by the VFT equation.

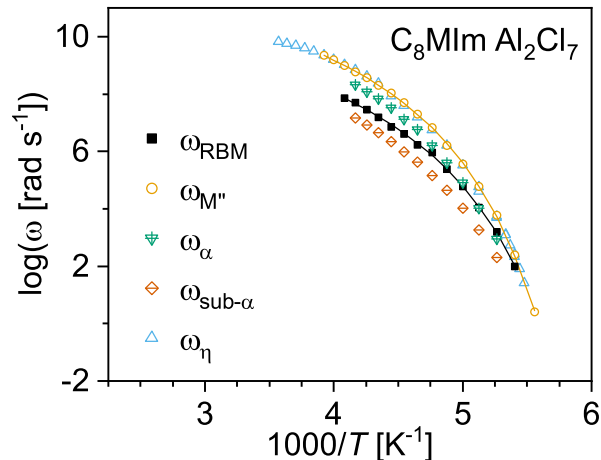

Figure 24: Temperature-dependent relaxation rates of the 1-methyl-3-octylimidazolium heptachlorodialuminate ( $C_8MIm Al_2Cl_7$ ). Rates are obtained by analysis of the dielectric spectra ( $\omega_{RBM}$ ,  $\omega_{M''}$ ,  $\omega_{\alpha}$ ,  $\omega_{sub-\alpha}$ ) and rheology ( $\omega_{\eta}$ ). Lines correspond to fits by the VFT equation.

## References

## References

- (1) Kremer, F.; Schönals, A. *Broadband Dielectric Spectroscopy*; Springer, Berlin, 2003; p 729.
